# Supplementary material for: Identification of novel candidate loci and genes for seed vigor-related traits in upland cotton (Gossypium hirsutum L.) via GWAS
Source: PubMed Central journal article supplement (PMC10503134; doi:10.3389/fpls.2023.1254365), 2023-09-01
Supplement: Image_1.pdf [file Image_1.pdf]

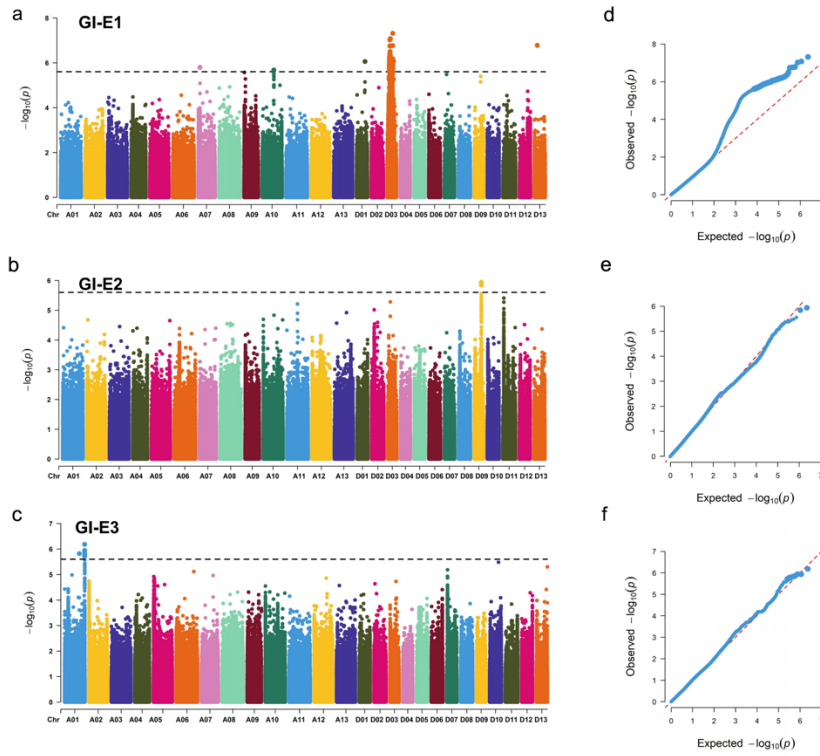

**Fig. S1:** Manhattan and QQ plots for GI in each separate environment

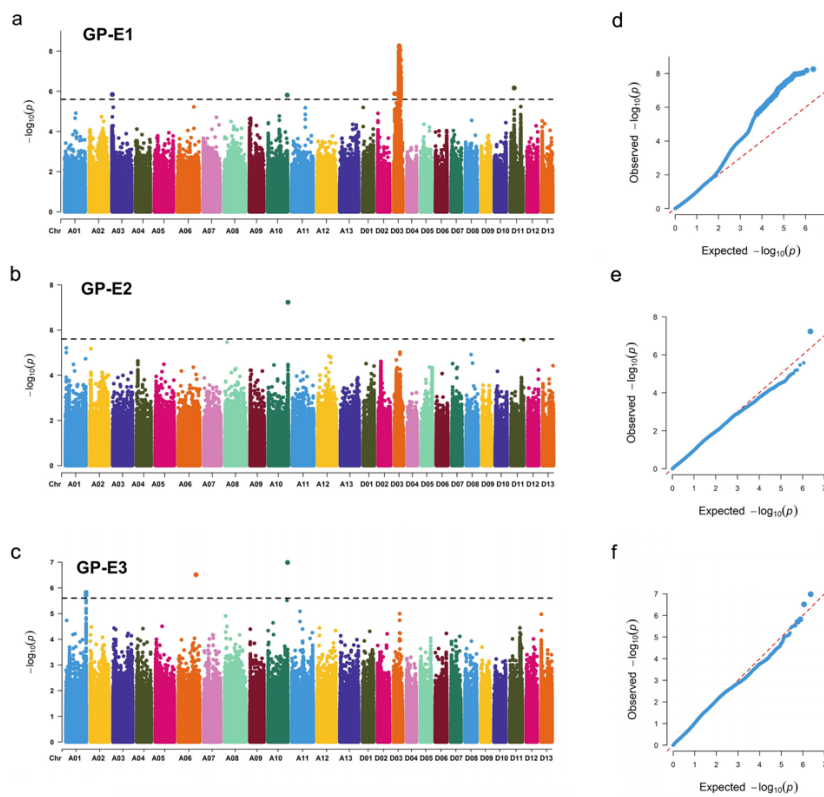

**Fig. S2:** Manhattan and QQ plots for GP in each separate environment

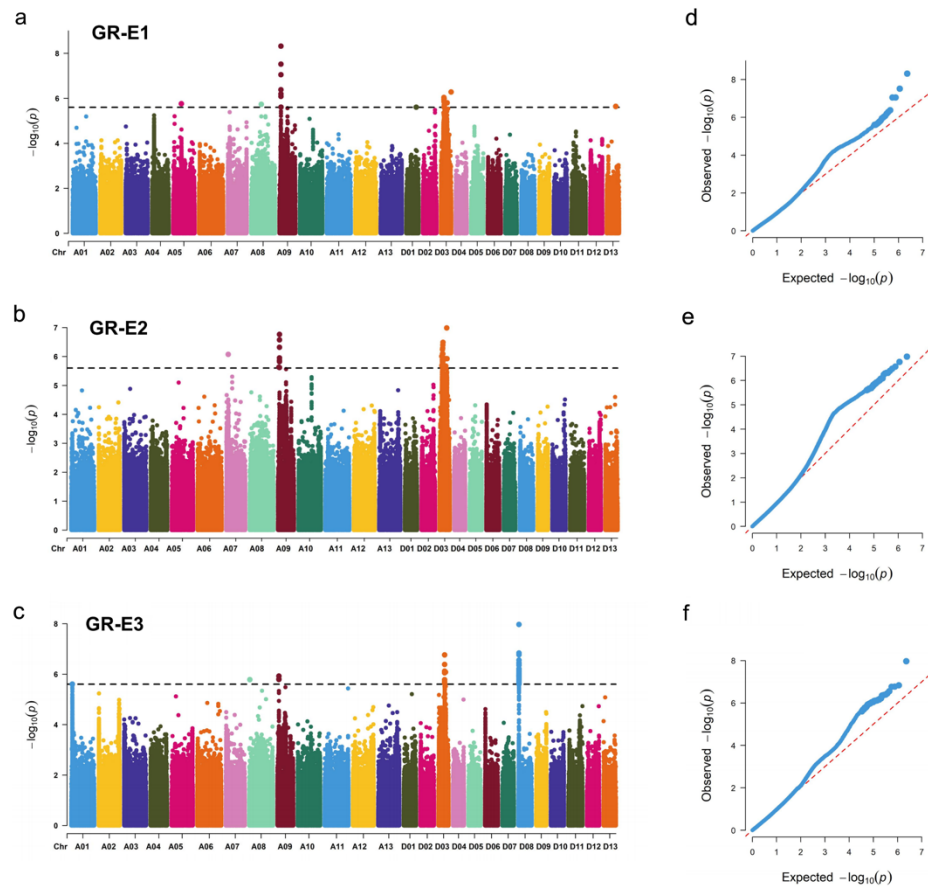

**Fig. S3:** Manhattan and QQ plots for GR in each separate environment

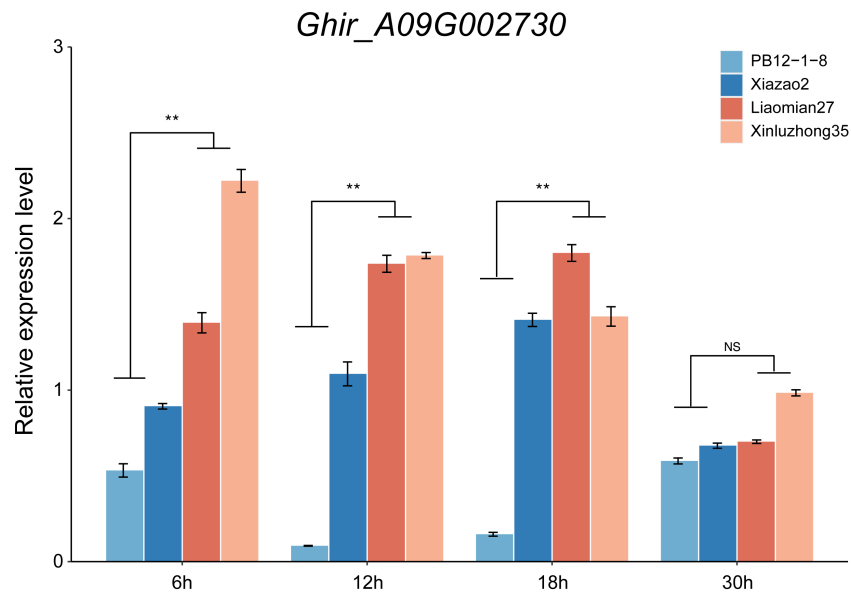

**Fig. S4:** Expression level analysis of *Ghir\_A09G002730* between ‘Liaomian27’, ‘Xinluzhong35’, ‘PB12-1-8’, and ‘Xiazao2’ during seed germination stage (6, 12, 18 and 30 h) by qRT-PCR (\*\* P < 0.01, \* P < 0.05).

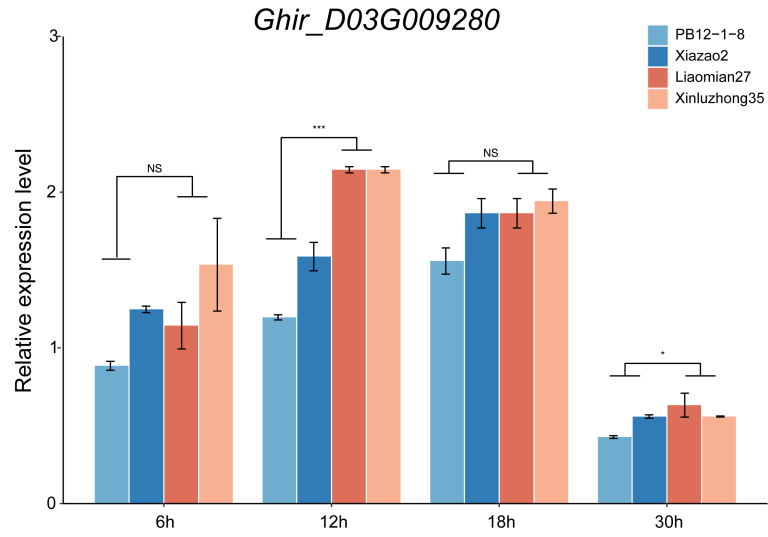

**Fig. S5:** Expression level analysis of *Ghir\_D03G009280* between “Liaomian27”, ‘Xinluzhong35’, ‘PB12-1-8’, and ‘Xiazao2’ during seed germination stage (6, 12, 18 and 30 h) by qRT-PCR (\*\*  $P < 0.01$ , \*  $P < 0.05$ ).
