# Supplementary material for: Identification of novel candidate loci and genes for seed vigor-related traits in upland cotton (Gossypium hirsutum L.) via GWAS
Source: Front Plant Sci. 2023 Sep 1;14:1254365. doi: 10.3389/fpls.2023.1254365 (PMC10503134; doi:10.3389/fpls.2023.1254365)
Supplement: Supplementary file 1 [file Table_1.xlsx]

## Sheet: Table  S1
Table S1: Summary of SNPs in each chromosome
Chromosome	Upstream	Downstream	Exonic	Synonymous	Nonsynonymous	Intronic	Intergenic	UTR3	UTR5
A01	4360	2887	623	204	405	2700	91295	464	262
A02	3363	2058	652	216	419	1896	48273	437	165
A03	4124	2955	644	212	410	1612	63819	465	236
A04	3020	2122	659	210	425	1705	40982	269	129
A05	8446	5242	1080	356	685	3460	73762	845	620
A06	5603	3844	885	285	574	2664	202786	552	346
A07	4826	3334	616	212	388	2173	71086	505	271
A08	6539	4208	817	271	524	2531	243998	671	413
A09	4753	3150	622	198	410	2259	70407	536	300
A10	4593	3238	790	234	529	2573	90534	436	328
A11	6100	3965	1252	394	806	3187	70200	625	358
A12	4802	3034	611	184	398	2054	54351	488	300
A13	5777	3608	891	317	556	2537	120607	597	383
D01	7683	4437	884	293	574	4450	78698	796	383
D02	7499	4645	1254	451	787	4609	66750	878	364
D03	3532	2303	430	130	294	1140	29196	340	194
D04	3743	2418	437	152	277	1522	24335	405	206
D05	8217	4479	1173	396	755	3268	31522	821	500
D06	5727	4066	687	235	442	3080	80771	752	347
D07	6240	4458	685	230	441	2653	70001	645	422
D08	6679	4449	853	306	531	2784	77175	712	429
D09	6217	3869	716	256	429	2640	59667	717	358
D10	7268	4518	959	307	632	3800	42303	675	420
D11	5250	3252	780	274	487	2730	31669	604	351
D12	6155	3856	563	190	365	2245	41712	631	438
D13	5641	3414	621	201	401	2408	33245	528	302
Total	146157	93809	20184	6714	12944	68680	1909144	15394	8825

## Sheet: Table S2
Table S2: Phenotypic variation of SV-related traits in upland cotton of natural population
Traits	Env	Min	Max	Mean	SD	P value*	CV(%)
GI	E1	30.58	69.48	55.23	6.63	0.00045	12.02
	E2	48.29	67.93	58.92	3.97	0.03	6.75
	E3	43.54	65.94	55.91	3.64	0.58	6.52
GP(%)	E1	40.6	87.33	70.92	8.27	4.32e-09	11.67
	E2	52	93.33	79.61	7.331	1e-06	9.21
	E3	50.6	90	75.91	7.11	5.72e-05	9.37
GR(%)	E1	64	99.33	87.37	8.07	2.84e-13	10.84
	E2	76	100	93.25	5.06	1e-06	5.43
	E3	76	95	87.52	3.25	1.14e-07	3.71
*: Shapiro–Wilk Test

## Sheet: Table S3
Table S3: Variance analysis for SV-related traits in the natural population
Trait	Variables	df	Sum of squares	F-value	P-value	H2
GI	Environment	2	7774	664.253	<0.001	0.7603
	Genotype	354	45598	22.012	<0.001
	Genotype × environment	708	28237	6.815	<0.001
	Error	2012	11774
GP	Environment	2	39468	1363.83	<0.001	0.8175
	Genotype	354	143271	27.97	<0.001
	Genotype × environment	708	36422	3.555	<0.001
	Error	2063	29851
GR	Environment	2	22421	1140.75	<0.001	0.7423
	Genotype	354	71448	20.538	<0.001
	Genotype × environment	708	20555	2.988	<0.001
	Error	1966	19321

## Sheet: Table S4
Table S4: Significant SNPs associated with SV-related traits
Trait	Environment	SNP	Chromosome	Position	allele	P value	R2
GI	BLUP	rsD03_31912853	D03	31912853	C/T	7.95	0.0879
GI	BLUP	rsD07_13585834	D07	13585834	G/A	6.81	0.0747
GI	E1	rsD01_49601156	D01	49601156	T/C	6.06	0.066
GI	E1	rsD03_12037981	D03	12037981	A/G	6.09	0.0664
GI	E1	rsD03_12398371	D03	12398371	C/G	6.25	0.0682
GI	E1	rsD03_12499923	D03	12499923	G/A	6.11	0.0665
GI	E1	rsD03_12652207	D03	12652207	A/G	6.12	0.0667
GI	E1	rsD03_12798540	D03	12798540	C/T	6.07	0.0661
GI	E1	rsD03_13080791	D03	13080791	C/A	6.06	0.066
GI	E1	rsD03_13308210	D03	13308210	C/A	6.05	0.0659
GI	E1	rsD03_13919595	D03	13919595	C/T	6.14	0.067
GI	E1	rsD03_14088085	D03	14088085	G/A	6.23	0.068
GI	E1	rsD03_14088431	D03	14088431	T/A	6.39	0.0698
GI	E1	rsD03_14531096	D03	14531096	C/T	6.07	0.0661
GI	E1	rsD03_14728662	D03	14728662	G/A	6.31	0.0688
GI	E1	rsD03_14907010	D03	14907010	G/T	7.02	0.0772
GI	E1	rsD03_14963054	D03	14963054	A/G	6.09	0.0663
GI	E1	rsD03_15149331	D03	15149331	C/T	6.74	0.0739
GI	E1	rsD03_15180622	D03	15180622	T/C	6.08	0.0662
GI	E1	rsD03_15191977	D03	15191977	G/A	6.2	0.0676
GI	E1	rsD03_15268403	D03	15268403	C/T	6.13	0.0668
GI	E1	rsD03_15422727	D03	15422727	G/A	6.11	0.0666
GI	E1	rsD03_15446877	D03	15446877	A/G	6.01	0.0654
GI	E1	rsD03_15514727	D03	15514727	C/G	6.03	0.0656
GI	E1	rsD03_15656618	D03	15656618	T/G	6.05	0.0658
GI	E1	rsD03_15699156	D03	15699156	A/G	6.76	0.0742
GI	E1	rsD03_15892864	D03	15892864	G/A	6.11	0.0666
GI	E1	rsD03_15951077	D03	15951077	T/A	6.22	0.0678
GI	E1	rsD03_16096147	D03	16096147	T/A	6.07	0.0661
GI	E1	rsD03_16221974	D03	16221974	C/T	6.08	0.0662
GI	E1	rsD03_16241080	D03	16241080	T/C	6.5	0.0712
GI	E1	rsD03_16367503	D03	16367503	A/G	6.28	0.0685
GI	E1	rsD03_16640949	D03	16640949	G/A	6.06	0.066
GI	E1	rsD03_16991244	D03	16991244	T/G	6.06	0.066
GI	E1	rsD03_17044820	D03	17044820	A/G	6.16	0.0672
GI	E1	rsD03_17053273	D03	17053273	T/C	6.08	0.0662
GI	E1	rsD03_17164046	D03	17164046	G/A	6.14	0.067
GI	E1	rsD03_17314031	D03	17314031	G/A	6.1	0.0665
GI	E1	rsD03_17455480	D03	17455480	C/A	6.2	0.0676
GI	E1	rsD03_17639861	D03	17639861	A/T	7.08	0.0779
GI	E1	rsD03_17732616	D03	17732616	A/T	6.35	0.0693
GI	E1	rsD03_17881563	D03	17881563	A/G	6.04	0.0657
GI	E1	rsD03_17964972	D03	17964972	T/C	6.13	0.0668
GI	E1	rsD03_18320717	D03	18320717	G/T	6.21	0.0678
GI	E1	rsD03_18923357	D03	18923357	A/C	6.2	0.0676
GI	E1	rsD03_26725716	D03	26725716	G/T	6	0.0653
GI	E1	rsD03_31713228	D03	31713228	G/A	6.18	0.0674
GI	E1	rsD03_31713231	D03	31713231	G/A	6.18	0.0674
GI	E1	rsD03_31912853	D03	31912853	C/T	7.32	0.0806
GI	E1	rsD03_31950370	D03	31950370	G/A	6.77	0.0742
GI	E1	rsD03_31975331	D03	31975331	G/A	6.18	0.0674
GI	E1	rsD03_36696073	D03	36696073	A/C	6.07	0.0661
GI	E1	rsD13_17306548	D13	17306548	T/C	6.78	0.0744
GI	E3	rsA01_116379262	A01	116379262	A/G	6.18	0.0674
GP	BLUP	rsA10_112752002	A10	112752002	C/T	7.96	0.0881
GP	BLUP	rsD03_31686969	D03	31686969	A/C	6.08	0.0662
GP	BLUP	rsD03_31912853	D03	31912853	C/T	6.92	0.0761
GP	BLUP	rsD03_32121851	D03	32121851	G/A	6.03	0.0656
GP	BLUP	rsD03_32217200	D03	32217200	A/G	6.09	0.0663
GP	BLUP	rsD03_32407516	D03	32407516	A/G	6.01	0.0655
GP	BLUP	rsD03_32411896	D03	32411896	T/C	6.25	0.0682
GP	BLUP	rsD03_32414028	D03	32414028	G/A	6.02	0.0656
GP	BLUP	rsD03_32429655	D03	32429655	G/A	6.43	0.0703
GP	BLUP	rsD03_32518414	D03	32518414	A/G	6.23	0.068
GP	BLUP	rsD03_32611645	D03	32611645	A/G	6.1	0.0664
GP	BLUP	rsD03_35130246	D03	35130246	A/G	6.06	0.066
GP	E1	rsD03_31670991	D03	31670991	T/A	6.11	0.0666
GP	E1	rsD03_31671120	D03	31671120	T/A	6.15	0.067
GP	E1	rsD03_31671314	D03	31671314	T/C	6.45	0.0706
GP	E1	rsD03_31672874	D03	31672874	T/C	6.11	0.0665
GP	E1	rsD03_31673485	D03	31673485	G/A	6.6	0.0723
GP	E1	rsD03_31674072	D03	31674072	A/G	6.18	0.0674
GP	E1	rsD03_31681989	D03	31681989	G/A	6.41	0.07
GP	E1	rsD03_31682614	D03	31682614	T/C	6.51	0.0712
GP	E1	rsD03_31682917	D03	31682917	C/A	6.56	0.0719
GP	E1	rsD03_31683318	D03	31683318	G/A	6.17	0.0673
GP	E1	rsD03_31683446	D03	31683446	G/T	6.14	0.0669
GP	E1	rsD03_31685439	D03	31685439	T/G	6.34	0.0692
GP	E1	rsD03_31686082	D03	31686082	G/A	7.47	0.0824
GP	E1	rsD03_31686790	D03	31686790	A/G	6.11	0.0665
GP	E1	rsD03_31686969	D03	31686969	A/C	7.13	0.0785
GP	E1	rsD03_31687799	D03	31687799	C/T	6.63	0.0727
GP	E1	rsD03_31687851	D03	31687851	T/G	6.11	0.0666
GP	E1	rsD03_31687961	D03	31687961	T/C	6.25	0.0683
GP	E1	rsD03_31694343	D03	31694343	G/A	6.09	0.0663
GP	E1	rsD03_31701395	D03	31701395	T/A	6.12	0.0667
GP	E1	rsD03_31710641	D03	31710641	A/G	6.19	0.0675
GP	E1	rsD03_31769128	D03	31769128	T/C	6.1	0.0664
GP	E1	rsD03_31783916	D03	31783916	G/A	6.14	0.0669
GP	E1	rsD03_31787304	D03	31787304	T/C	6.24	0.0681
GP	E1	rsD03_31787312	D03	31787312	T/C	6.03	0.0657
GP	E1	rsD03_31789713	D03	31789713	A/G	6.36	0.0695
GP	E1	rsD03_31802141	D03	31802141	A/G	6.46	0.0706
GP	E1	rsD03_31803182	D03	31803182	C/T	6.39	0.0699
GP	E1	rsD03_31836439	D03	31836439	A/C	6.15	0.0671
GP	E1	rsD03_31836767	D03	31836767	G/A	6.42	0.0702
GP	E1	rsD03_31852067	D03	31852067	C/T	6.08	0.0662
GP	E1	rsD03_31852094	D03	31852094	A/C	6.42	0.0702
GP	E1	rsD03_31852479	D03	31852479	C/A	6.25	0.0682
GP	E1	rsD03_31857307	D03	31857307	G/A	6.16	0.0672
GP	E1	rsD03_31857412	D03	31857412	T/G	6.05	0.0658
GP	E1	rsD03_31857760	D03	31857760	T/C	6.03	0.0656
GP	E1	rsD03_31858763	D03	31858763	A/G	6.28	0.0685
GP	E1	rsD03_31861373	D03	31861373	G/A	6.09	0.0663
GP	E1	rsD03_31863068	D03	31863068	G/T	6.91	0.0759
GP	E1	rsD03_31872570	D03	31872570	G/A	6.08	0.0662
GP	E1	rsD03_31872716	D03	31872716	T/C	6.08	0.0663
GP	E1	rsD03_31872968	D03	31872968	C/T	6.4	0.07
GP	E1	rsD03_31873327	D03	31873327	A/G	6.36	0.0695
GP	E1	rsD03_31873343	D03	31873343	C/T	6.36	0.0695
GP	E1	rsD03_31873666	D03	31873666	G/A	6.07	0.0661
GP	E1	rsD03_31875451	D03	31875451	T/C	6.06	0.066
GP	E1	rsD03_31875778	D03	31875778	C/A	6.13	0.0668
GP	E1	rsD03_31880818	D03	31880818	T/C	6.04	0.0658
GP	E1	rsD03_31880973	D03	31880973	A/C	6.02	0.0655
GP	E1	rsD03_31881277	D03	31881277	A/G	6.07	0.0661
GP	E1	rsD03_31881836	D03	31881836	T/C	6.03	0.0657
GP	E1	rsD03_31882889	D03	31882889	G/A	6.4	0.0699
GP	E1	rsD03_31883966	D03	31883966	C/T	6.03	0.0656
GP	E1	rsD03_31888002	D03	31888002	T/C	6.3	0.0688
GP	E1	rsD03_31888476	D03	31888476	A/T	6.02	0.0655
GP	E1	rsD03_31890153	D03	31890153	G/A	6.06	0.066
GP	E1	rsD03_31890665	D03	31890665	A/G	6.03	0.0656
GP	E1	rsD03_31890772	D03	31890772	C/T	6.28	0.0685
GP	E1	rsD03_31893598	D03	31893598	G/A	6.05	0.0659
GP	E1	rsD03_31897466	D03	31897466	G/A	6.24	0.0681
GP	E1	rsD03_31898253	D03	31898253	T/G	6.07	0.0661
GP	E1	rsD03_31899896	D03	31899896	G/A	6.41	0.07
GP	E1	rsD03_31904039	D03	31904039	G/T	6.01	0.0654
GP	E1	rsD03_31904252	D03	31904252	A/G	6.02	0.0655
GP	E1	rsD03_31905285	D03	31905285	A/G	6.18	0.0674
GP	E1	rsD03_31905953	D03	31905953	C/T	6.11	0.0666
GP	E1	rsD03_31911275	D03	31911275	A/C	6.01	0.0654
GP	E1	rsD03_31912853	D03	31912853	C/T	7.88	0.0871
GP	E1	rsD03_31914044	D03	31914044	T/A	6.03	0.0657
GP	E1	rsD03_31922389	D03	31922389	T/C	6.33	0.0691
GP	E1	rsD03_31922391	D03	31922391	T/C	6.33	0.0691
GP	E1	rsD03_31922404	D03	31922404	C/T	6.39	0.0698
GP	E1	rsD03_31922410	D03	31922410	C/T	6.39	0.0698
GP	E1	rsD03_31923089	D03	31923089	G/A	6.14	0.0669
GP	E1	rsD03_31924631	D03	31924631	A/C	6.49	0.071
GP	E1	rsD03_31935133	D03	31935133	G/A	6.71	0.0735
GP	E1	rsD03_31938966	D03	31938966	T/C	6.22	0.0679
GP	E1	rsD03_31939021	D03	31939021	C/A	7.01	0.0771
GP	E1	rsD03_31939656	D03	31939656	G/C	6.3	0.0688
GP	E1	rsD03_31944628	D03	31944628	A/G	6.66	0.0729
GP	E1	rsD03_31948684	D03	31948684	G/C	6.82	0.0748
GP	E1	rsD03_31951310	D03	31951310	T/A	6.12	0.0667
GP	E1	rsD03_31952232	D03	31952232	C/T	6.42	0.0702
GP	E1	rsD03_31952247	D03	31952247	G/C	6.22	0.0678
GP	E1	rsD03_31959774	D03	31959774	G/C	6.33	0.0691
GP	E1	rsD03_31961777	D03	31961777	C/T	6.94	0.0762
GP	E1	rsD03_31962193	D03	31962193	C/T	6.41	0.07
GP	E1	rsD03_31962264	D03	31962264	T/C	6.13	0.0668
GP	E1	rsD03_31962914	D03	31962914	G/A	6.58	0.072
GP	E1	rsD03_31963070	D03	31963070	A/G	6.2	0.0676
GP	E1	rsD03_32031746	D03	32031746	A/G	6.24	0.0681
GP	E1	rsD03_32043794	D03	32043794	A/G	6.72	0.0736
GP	E1	rsD03_32108764	D03	32108764	C/T	7.61	0.084
GP	E1	rsD03_32116690	D03	32116690	A/G	7.35	0.0809
GP	E1	rsD03_32116853	D03	32116853	T/C	7.18	0.079
GP	E1	rsD03_32121851	D03	32121851	G/A	7.67	0.0847
GP	E1	rsD03_32123311	D03	32123311	A/G	7.12	0.0784
GP	E1	rsD03_32131926	D03	32131926	A/C	6.99	0.0768
GP	E1	rsD03_32133486	D03	32133486	T/C	6.52	0.0714
GP	E1	rsD03_32134342	D03	32134342	A/C	6.7	0.0734
GP	E1	rsD03_32141524	D03	32141524	A/C	7.09	0.0779
GP	E1	rsD03_32146118	D03	32146118	C/T	6.31	0.0689
GP	E1	rsD03_32166423	D03	32166423	A/G	6.34	0.0693
GP	E1	rsD03_32177399	D03	32177399	T/C	7.14	0.0785
GP	E1	rsD03_32177428	D03	32177428	A/C	7.12	0.0783
GP	E1	rsD03_32180562	D03	32180562	C/T	8.27	0.0915
GP	E1	rsD03_32186143	D03	32186143	A/G	7.98	0.0883
GP	E1	rsD03_32186408	D03	32186408	A/G	7.28	0.0802
GP	E1	rsD03_32189796	D03	32189796	G/A	7.19	0.0792
GP	E1	rsD03_32191423	D03	32191423	A/G	6.46	0.0706
GP	E1	rsD03_32191897	D03	32191897	T/A	6.92	0.076
GP	E1	rsD03_32192957	D03	32192957	A/G	7.25	0.0798
GP	E1	rsD03_32194634	D03	32194634	A/G	6.58	0.072
GP	E1	rsD03_32197903	D03	32197903	C/A	7.32	0.0807
GP	E1	rsD03_32199965	D03	32199965	C/T	6.48	0.0708
GP	E1	rsD03_32205228	D03	32205228	A/T	7.38	0.0813
GP	E1	rsD03_32209566	D03	32209566	T/A	6.59	0.0722
GP	E1	rsD03_32211423	D03	32211423	A/G	7.52	0.083
GP	E1	rsD03_32217200	D03	32217200	A/G	7.96	0.0881
GP	E1	rsD03_32220128	D03	32220128	C/T	6.35	0.0694
GP	E1	rsD03_32223505	D03	32223505	G/A	7.31	0.0805
GP	E1	rsD03_32225922	D03	32225922	A/C	7.17	0.0789
GP	E1	rsD03_32235852	D03	32235852	T/C	6.83	0.0749
GP	E1	rsD03_32236408	D03	32236408	A/G	6.69	0.0733
GP	E1	rsD03_32237179	D03	32237179	T/C	6.72	0.0737
GP	E1	rsD03_32247731	D03	32247731	T/C	7.06	0.0776
GP	E1	rsD03_32248364	D03	32248364	A/T	6.35	0.0694
GP	E1	rsD03_32266487	D03	32266487	T/C	6.78	0.0744
GP	E1	rsD03_32280025	D03	32280025	T/C	6.87	0.0754
GP	E1	rsD03_32407516	D03	32407516	A/G	7.27	0.08
GP	E1	rsD03_32411896	D03	32411896	T/C	7.82	0.0865
GP	E1	rsD03_32414028	D03	32414028	G/A	7.31	0.0805
GP	E1	rsD03_32414064	D03	32414064	C/T	6.42	0.0702
GP	E1	rsD03_32415791	D03	32415791	T/C	7.51	0.0829
GP	E1	rsD03_32429655	D03	32429655	G/A	8.18	0.0906
GP	E1	rsD03_32518414	D03	32518414	A/G	8	0.0885
GP	E1	rsD03_32530181	D03	32530181	G/T	7.28	0.0802
GP	E1	rsD03_32535261	D03	32535261	C/T	6.08	0.0662
GP	E1	rsD03_32583182	D03	32583182	G/A	6.43	0.0703
GP	E1	rsD03_32597785	D03	32597785	C/A	6.14	0.0669
GP	E1	rsD03_32604723	D03	32604723	A/G	6.5	0.0711
GP	E1	rsD03_32604967	D03	32604967	T/C	7.46	0.0823
GP	E1	rsD03_32611645	D03	32611645	A/G	7.61	0.0841
GP	E1	rsD03_32620581	D03	32620581	T/G	7.16	0.0788
GP	E1	rsD03_32686664	D03	32686664	C/T	6.24	0.0681
GP	E1	rsD03_32686758	D03	32686758	T/C	7.16	0.0787
GP	E1	rsD03_32695535	D03	32695535	A/C	7.5	0.0828
GP	E1	rsD03_32703269	D03	32703269	T/C	7.65	0.0845
GP	E1	rsD03_32714971	D03	32714971	T/A	7.97	0.0881
GP	E1	rsD03_32877804	D03	32877804	T/C	7.72	0.0852
GP	E1	rsD03_32985755	D03	32985755	G/A	6.12	0.0667
GP	E1	rsD03_33027104	D03	33027104	T/C	6.68	0.0732
GP	E1	rsD03_33071876	D03	33071876	C/T	6.84	0.0751
GP	E1	rsD03_33115792	D03	33115792	T/C	6.38	0.0698
GP	E1	rsD03_33230714	D03	33230714	G/T	6.83	0.0749
GP	E1	rsD03_36696073	D03	36696073	A/C	8.04	0.089
GP	E1	rsD03_37595985	D03	37595985	A/G	7.03	0.0773
GP	E1	rsD03_37922251	D03	37922251	T/C	6.24	0.068
GP	E1	rsD03_37950264	D03	37950264	C/G	6.29	0.0686
GP	E1	rsD03_38010395	D03	38010395	A/G	6.72	0.0737
GP	E1	rsD03_38030754	D03	38030754	A/G	6.21	0.0677
GP	E1	rsD03_38060837	D03	38060837	G/A	6.15	0.067
GP	E1	rsD03_38110251	D03	38110251	A/G	6.37	0.0696
GP	E1	rsD03_38189392	D03	38189392	C/G	6.47	0.0708
GP	E1	rsD03_38197905	D03	38197905	A/G	6.07	0.0661
GP	E1	rsD03_38205704	D03	38205704	A/C	6.4	0.0699
GP	E1	rsD03_38219036	D03	38219036	A/G	6.5	0.0711
GP	E1	rsD03_38375661	D03	38375661	T/C	6.32	0.069
GP	E1	rsD03_38384624	D03	38384624	G/A	6.56	0.0718
GP	E1	rsD03_38445420	D03	38445420	A/G	6.6	0.0723
GP	E1	rsD03_38451719	D03	38451719	A/G	6.65	0.0728
GP	E1	rsD03_38470193	D03	38470193	A/G	6.67	0.0731
GP	E1	rsD03_38474154	D03	38474154	T/C	6.72	0.0737
GP	E1	rsD03_38491965	D03	38491965	T/G	6.24	0.0681
GP	E1	rsD03_38533246	D03	38533246	T/C	6.44	0.0704
GP	E1	rsD03_38782780	D03	38782780	T/C	6.23	0.068
GP	E1	rsD03_38843446	D03	38843446	A/G	6.2	0.0676
GP	E1	rsD03_38950556	D03	38950556	A/T	6.09	0.0663
GP	E1	rsD03_38960617	D03	38960617	G/T	6.67	0.0731
GP	E1	rsD03_38966194	D03	38966194	T/C	6.55	0.0717
GP	E1	rsD03_39076765	D03	39076765	A/G	6.61	0.0724
GP	E1	rsD03_39137197	D03	39137197	A/G	6.3	0.0688
GP	E1	rsD03_39170262	D03	39170262	A/G	6.34	0.0693
GP	E1	rsD03_39273424	D03	39273424	A/G	7.21	0.0793
GP	E1	rsD03_39375687	D03	39375687	C/T	6.02	0.0656
GP	E1	rsD03_39601387	D03	39601387	T/C	6.16	0.0671
GP	E1	rsD03_39627577	D03	39627577	A/G	7.57	0.0835
GP	E1	rsD03_39678330	D03	39678330	A/C	6.18	0.0674
GP	E1	rsD03_39779116	D03	39779116	G/A	6.58	0.072
GP	E1	rsD03_39805907	D03	39805907	A/T	6.47	0.0708
GP	E1	rsD03_39814376	D03	39814376	C/G	6.47	0.0707
GP	E1	rsD03_39910274	D03	39910274	C/T	6.72	0.0737
GP	E1	rsD03_40070101	D03	40070101	A/G	6.3	0.0688
GP	E1	rsD03_40167952	D03	40167952	T/C	6.65	0.0728
GP	E1	rsD03_40182373	D03	40182373	G/A	6.65	0.0728
GP	E1	rsD03_40183246	D03	40183246	A/G	6.92	0.076
GP	E1	rsD03_40264919	D03	40264919	T/A	6.53	0.0715
GP	E1	rsD03_40288979	D03	40288979	T/G	6.51	0.0712
GP	E1	rsD11_23007263	D11	23007263	A/C	6.17	0.0672
GP	E2	rsA10_112752002	A10	112752002	C/T	7.23	0.0796
GP	E3	rsA06_102561916	A06	102561916	G/A	6.51	0.0713
GP	E3	rsA10_112752002	A10	112752002	C/T	6.99	0.0768
GR	BLUP	rsA09_7745467	A09	7745467	T/C	6.19	0.0675
GR	BLUP	rsA09_7791621	A09	7791621	A/G	6.12	0.0666
GR	BLUP	rsA09_7878527	A09	7878527	T/C	8.15	0.0903
GR	BLUP	rsA09_7908017	A09	7908017	A/G	6.31	0.0689
GR	BLUP	rsA09_7954329	A09	7954329	G/C	7.27	0.08
GR	BLUP	rsA09_7954353	A09	7954353	A/G	7.27	0.08
GR	BLUP	rsA09_7962794	A09	7962794	G/A	7.57	0.0835
GR	BLUP	rsD03_16442805	D03	16442805	T/A	6.2	0.0676
GR	BLUP	rsD03_31976644	D03	31976644	G/A	6.06	0.0659
GR	BLUP	rsD03_36696073	D03	36696073	A/C	6.53	0.0715
GR	E1	rsA09_7745467	A09	7745467	T/C	6.19	0.0676
GR	E1	rsA09_7791621	A09	7791621	A/G	6.38	0.0698
GR	E1	rsA09_7878527	A09	7878527	T/C	8.32	0.0922
GR	E1	rsA09_7908017	A09	7908017	A/G	6.08	0.0663
GR	E1	rsA09_7954329	A09	7954329	G/C	7.05	0.0776
GR	E1	rsA09_7954353	A09	7954353	A/G	7.05	0.0776
GR	E1	rsA09_7962794	A09	7962794	G/A	7.52	0.083
GR	E1	rsD03_15149331	D03	15149331	C/T	6.04	0.0658
GR	E1	rsD03_51904225	D03	51904225	A/T	6.28	0.0686
GR	E2	rsA07_10830681	A07	10830681	G/A	6.07	0.0661
GR	E2	rsA09_7878527	A09	7878527	T/C	6.76	0.0742
GR	E2	rsA09_7954329	A09	7954329	G/C	6.32	0.069
GR	E2	rsA09_7954353	A09	7954353	A/G	6.32	0.069
GR	E2	rsA09_7962794	A09	7962794	G/A	6.58	0.072
GR	E2	rsD03_11797692	D03	11797692	G/T	6.01	0.0654
GR	E2	rsD03_15149331	D03	15149331	C/T	6.09	0.0664
GR	E2	rsD03_15180622	D03	15180622	T/C	6.24	0.0681
GR	E2	rsD03_16442805	D03	16442805	T/A	6.29	0.0686
GR	E2	rsD03_16862705	D03	16862705	G/T	6.09	0.0664
GR	E2	rsD03_17044820	D03	17044820	A/G	6.4	0.0699
GR	E2	rsD03_17639861	D03	17639861	A/T	6.49	0.071
GR	E2	rsD03_36696073	D03	36696073	A/C	6.99	0.0768
GR	E3	rsD03_32079284	D03	32079284	C/T	6.77	0.0742
GR	E3	rsD03_32123311	D03	32123311	A/G	6.39	0.0698
GR	E3	rsD03_32235852	D03	32235852	T/C	6.1	0.0665
GR	E3	rsD03_32280261	D03	32280261	A/G	6.12	0.0667
GR	E3	rsD03_32313704	D03	32313704	A/T	6.05	0.0659
GR	E3	rsD03_36696073	D03	36696073	A/C	6.08	0.0663
GR	E3	rsD08_3577026	D08	3577026	G/C	6.56	0.0718
GR	E3	rsD08_3660732	D08	3660732	T/A	7.97	0.0882
GR	E3	rsD08_3664727	D08	3664727	A/G	6.05	0.0658
GR	E3	rsD08_3672297	D08	3672297	A/T	6.04	0.0658
GR	E3	rsD08_3673081	D08	3673081	C/A	6.03	0.0656
GR	E3	rsD08_3673144	D08	3673144	T/C	6	0.0653
GR	E3	rsD08_3676683	D08	3676683	A/G	6.16	0.0672
GR	E3	rsD08_3677036	D08	3677036	C/T	6.46	0.0706
GR	E3	rsD08_3677359	D08	3677359	T/G	6.04	0.0657
GR	E3	rsD08_3680637	D08	3680637	A/G	6.2	0.0677
GR	E3	rsD08_3680796	D08	3680796	T/A	6.12	0.0667
GR	E3	rsD08_3689170	D08	3689170	G/A	6.4	0.07
GR	E3	rsD08_3689195	D08	3689195	C/T	6.11	0.0666
GR	E3	rsD08_3689210	D08	3689210	G/A	6.11	0.0666
GR	E3	rsD08_3689364	D08	3689364	A/G	6.35	0.0694
GR	E3	rsD08_3689594	D08	3689594	A/C	6.09	0.0664
GR	E3	rsD08_3690770	D08	3690770	C/A	6.01	0.0654
GR	E3	rsD08_3690805	D08	3690805	A/G	6.37	0.0696
GR	E3	rsD08_3690866	D08	3690866	A/T	6.22	0.0678
GR	E3	rsD08_3692461	D08	3692461	A/C	6.84	0.0751
GR	E3	rsD08_3692472	D08	3692472	C/T	6.77	0.0743
GR	E3	rsD08_3692971	D08	3692971	T/C	6.16	0.0672
GR	E3	rsD08_3693119	D08	3693119	G/C	6.14	0.067

## Sheet: Table S5
Table S5: Summary of the annotations of 22 genes on chromosome A09
G.hirsutum gene ID	Arabidopsis ID	TPM (0 h)	TPM (5 h)	TPM (10 h)	ArabDesc
Ghir_A09G002590	AT5G14950.1	11.2539	11.0204	7.50253	Symbols: GMII, ATGMII | golgi alpha-mannosidase II | chr5:4837484-4841792 REVERSE LENGTH=1173
Ghir_A09G002600	AT5G14940.1	0.07285	0	0	Symbols: | Major facilitator superfamily protein | chr5:4831748-4834312 REVERSE LENGTH=552
Ghir_A09G002610	AT3G01370.1	2.0108	2.85322	4.73097	Symbols: ATCFM2, CFM2 | CRM family member 2 | chr3:139033-143477 FORWARD LENGTH=1011
Ghir_A09G002620	AT4G15540.1	0	0	0	Symbols: | EamA-like transporter family | chr4:8873394-8875186 FORWARD LENGTH=347
Ghir_A09G002630	AT2G04700.1	1.56326	3.13718	2.95009	Symbols: | ferredoxin thioredoxin reductase catalytic beta chain family protein | chr2:1646961-1648345 FORWARD LENGTH=146
Ghir_A09G002640	AT1G70180.2	5.0579	13.7047	6.90106	Symbols: | Sterile alpha motif (SAM) domain-containing protein | chr1:26426768-26429097 FORWARD LENGTH=460
Ghir_A09G002650	AT5G14920.1	0	0	0	Symbols: | Gibberellin-regulated family protein | chr5:4826598-4827761 FORWARD LENGTH=275
Ghir_A09G002660	AT2G30900.1	0	0	1.01405	Symbols: TBL43 | TRICHOME BIREFRINGENCE-LIKE 43 | chr2:13150481-13152417 FORWARD LENGTH=368
Ghir_A09G002670	AT3G28180.1	1.40169	27.3552	18.5209	Symbols: ATCSLC04, CSLC04, ATCSLC4, CSLC4 | Cellulose-synthase-like C4 | chr3:10506110-10509067 FORWARD LENGTH=673
Ghir_A09G002680	AT5G40190.1	4.93647	6.85257	4.00742	Symbols: | RNA ligase/cyclic nucleotide phosphodiesterase family protein | chr5:16069298-16069849 REVERSE LENGTH=183
Ghir_A09G002690	AT1G70600.1	15.8706	75.4876	76.636	Symbols: | Ribosomal protein L18e/L15 superfamily protein | chr1:26621168-26621608 REVERSE LENGTH=146
Ghir_A09G002700	AT4G23160.1	0	0	0	Symbols: CRK8 | cysteine-rich RLK (RECEPTOR-like protein kinase) 8 | chr4:12129485-12134086 FORWARD LENGTH=1262
Ghir_A09G002710	AT5G40240.2	0.147074	0.18356	3.30913	Symbols: | nodulin MtN21 /EamA-like transporter family protein | chr5:16082325-16084810 REVERSE LENGTH=382
Ghir_A09G002720	NA	0.3084	0	0.523651	NA
Ghir_A09G002730	AT1G33350.1	10.0056	13.8576	10.9881	Symbols: | Pentatricopeptide repeat (PPR) superfamily protein | chr1:12090071-12091687 REVERSE LENGTH=538
Ghir_A09G002740	AT5G40250.1	0.617833	8.26334	5.97595	Symbols: | RING/U-box superfamily protein | chr5:16086056-16087186 FORWARD LENGTH=376
Ghir_A09G002750	AT5G14880.1	0.128259	0.139121	0.122601	Symbols: | Potassium transporter family protein | chr5:4814244-4817667 FORWARD LENGTH=781
Ghir_A09G002760	NA	0	0	0	NA
Ghir_A09G002770	AT4G23160.1	0	0	0	Symbols: CRK8 | cysteine-rich RLK (RECEPTOR-like protein kinase) 8 | chr4:12129485-12134086 FORWARD LENGTH=1262
Ghir_A09G002780	AT3G01460.1	13.8345	6.82848	5.31308	Symbols: MBD9, ATMBD9 | methyl-CPG-binding domain 9 | chr3:173316-182038 FORWARD LENGTH=2176
Ghir_A09G002790	AT3G01480.1	7.72302	1.28567	3.68027	Symbols: CYP38, ATCYP38 | cyclophilin 38 | chr3:188569-190674 FORWARD LENGTH=437
Ghir_A09G002800	AT5G40280.1	2.28047	2.94253	2.88869	Symbols: ERA1, ATFTB, WIG | Prenyltransferase family protein | chr5:16101391-16104783 FORWARD LENGTH=482

## Sheet: Table S6
Table S6: Summary of the annotations of 46 genes on chromosome D03
G.hirsutum gene ID	Arabidopsis ID	TPM (0 h)	TPM (5 h)	TPM (10 h)	ArabDesc
Ghir_D03G008940	AT1G64320.1	3.1305	0.998501	1.19528	Symbols: | myosin heavy chain-related | chr1:23869036-23870548 FORWARD LENGTH=476
Ghir_D03G008950	AT5G41790.1	73.5975	22.3448	8.71854	Symbols: CIP1 | COP1-interactive protein 1 | chr5:16727530-16732391 FORWARD LENGTH=1586
Ghir_D03G008960	AT2G46380.1	0	0	0	Symbols: | Protein of unknown function (DUF3133) | chr2:19039377-19042171 FORWARD LENGTH=768
Ghir_D03G008970	AT4G11090.1	2.99678	9.79979	11.0183	Symbols: TBL23 | TRICHOME BIREFRINGENCE-LIKE 23 | chr4:6764645-6766221 REVERSE LENGTH=432
Ghir_D03G008980	AT5G41800.1	0.254636	1.16542	1.43557	Symbols: | Transmembrane amino acid transporter family protein | chr5:16733842-16735888 FORWARD LENGTH=452
Ghir_D03G008990	NA	0	0	1.05763	NA
Ghir_D03G009000	NA	0	0	0	NA
Ghir_D03G009010	NA	0	0	0	NA
Ghir_D03G009020	AT1G64385.1	19.4801	46.0179	18.4026	Symbols: | unknown protein; FUNCTIONS IN: molecular_function unknown; INVOLVED IN: biological_process unknown; LOCATED IN: endomembrane system; Has 66 Blast hits to 66 proteins in 21 species: Archae - 0; Bacteria - 0; Metazoa - 6; Fungi - 4; Plants - 51; Viruses - 0; Other Eukaryotes - 5 (source: NCBI BLink). | chr1:23900309-23901956 FORWARD LENGTH=351
Ghir_D03G009030	AT1G64390.1	0	13.4698	15.7304	Symbols: AtGH9C2, GH9C2 | glycosyl hydrolase 9C2 | chr1:23911329-23914642 FORWARD LENGTH=620
Ghir_D03G009040	AT4G26080.1	21.2921	5.67411	0.257445	Symbols: ABI1, AtABI1 | Protein phosphatase 2C family protein | chr4:13220231-13221828 REVERSE LENGTH=434
Ghir_D03G009050	AT4G23840.1	18.7694	13.2808	7.76317	Symbols: | Leucine-rich repeat (LRR) family protein | chr4:12400379-12403190 FORWARD LENGTH=597
Ghir_D03G009060	AT3G53180.1	0.440173	0	0	Symbols: | glutamate-ammonia ligases;catalytics;glutamate-ammonia ligases | chr3:19707068-19711188 FORWARD LENGTH=852
Ghir_D03G009070	AT3G53180.1	1.17564	1.5377	1.24194	Symbols: | glutamate-ammonia ligases;catalytics;glutamate-ammonia ligases | chr3:19707068-19711188 FORWARD LENGTH=852
Ghir_D03G009080	AT4G23850.1	4.37684	16.1572	9.41862	Symbols: LACS4 | AMP-dependent synthetase and ligase family protein | chr4:12403720-12408263 REVERSE LENGTH=666
Ghir_D03G009090	AT5G62050.1	0	2.08361	1.93681	Symbols: OXA1, ATOXA1, OXA1AT | homolog of yeast oxidase assembly 1 (OXA1) | chr5:24924062-24926758 REVERSE LENGTH=429
Ghir_D03G009100	AT5G53110.1	0	0	0	Symbols: | RING/U-box superfamily protein | chr5:21529022-21533008 FORWARD LENGTH=382
Ghir_D03G009110	AT5G53110.1	0	0	0	Symbols: | RING/U-box superfamily protein | chr5:21529022-21533008 FORWARD LENGTH=382
Ghir_D03G009120	NoHits	0	0	0	NA
Ghir_D03G009130	AT5G53110.1	0	0	0	Symbols: | RING/U-box superfamily protein | chr5:21529022-21533008 FORWARD LENGTH=382
Ghir_D03G009140	AT5G53110.1	0	0.258574	0	Symbols: | RING/U-box superfamily protein | chr5:21529022-21533008 FORWARD LENGTH=382
Ghir_D03G009150	AT4G23160.1	0	0	0	Symbols: CRK8 | cysteine-rich RLK (RECEPTOR-like protein kinase) 8 | chr4:12129485-12134086 FORWARD LENGTH=1262
Ghir_D03G009160	AT5G53110.1	0	0	0	Symbols: | RING/U-box superfamily protein | chr5:21529022-21533008 FORWARD LENGTH=382
Ghir_D03G009170	AT5G53110.1	0	0.102231	0	Symbols: | RING/U-box superfamily protein | chr5:21529022-21533008 FORWARD LENGTH=382
Ghir_D03G009180	NoHits	0	1.08312	0	NA
Ghir_D03G009190	AT4G23880.1	0	0.430677	0	Symbols: | unknown protein; Has 73 Blast hits to 69 proteins in 22 species: Archae - 0; Bacteria - 4; Metazoa - 9; Fungi - 2; Plants - 18; Viruses - 0; Other Eukaryotes - 40 (source: NCBI BLink). | chr4:12415789-12416388 REVERSE LENGTH=199
Ghir_D03G009200	AT4G10960.1	2.27717	0.508099	0.353553	Symbols: UGE5 | UDP-D-glucose/UDP-D-galactose 4-epimerase 5 | chr4:6716083-6718472 REVERSE LENGTH=351
Ghir_D03G009210	AT4G23930.1	0.519456	10.5437	5.05413	Symbols: | Late embryogenesis abundant (LEA) hydroxyproline-rich glycoprotein family | chr4:12436131-12436694 REVERSE LENGTH=187
Ghir_D03G009220	AT2G46500.1	0	0.2656	0.203121	Symbols: ATPI4K GAMMA 4, UBDK GAMMA 4, PI4K GAMMA 4 | phosphoinositide 4-kinase gamma 4 | chr2:19086741-19088534 REVERSE LENGTH=566
Ghir_D03G009230	AT4G23950.2	0	0	0	Symbols: | Galactose-binding protein | chr4:12442297-12444330 FORWARD LENGTH=562
Ghir_D03G009240	AT4G10925.1	5.79257	5.91885	4.88243	Symbols: | Nuclear transport factor 2 (NTF2) family protein | chr4:6702987-6704283 REVERSE LENGTH=231
Ghir_D03G009250	AT4G10920.1	17.8003	44.3458	27.3604	Symbols: KELP | transcriptional coactivator p15 (PC4) family protein (KELP) | chr4:6697894-6699103 REVERSE LENGTH=165
Ghir_D03G009260	AT3G61920.1	0	0	0	Symbols: | unknown protein; FUNCTIONS IN: molecular_function unknown; INVOLVED IN: N-terminal protein myristoylation; LOCATED IN: cellular_component unknown; EXPRESSED IN: shoot, hypocotyl, root, egg cell; BEST Arabidopsis thaliana protein match is: unknown protein (TAIR:AT1G64700.1); Has 77 Blast hits to 77 proteins in 8 species: Archae - 0; Bacteria - 0; Metazoa - 0; Fungi - 0; Plants - 77; Vir…
Ghir_D03G009270	NA	0	0	0	NA
Ghir_D03G009280	AT4G23980.1	8.11499	8.45998	5.24307	Symbols: ARF9 | auxin response factor 9 | chr4:12451592-12454737 FORWARD LENGTH=638
Ghir_D03G009290	AT1G32928.1	18.2916	21.3377	17.1381	Symbols: | unknown protein; BEST Arabidopsis thaliana protein match is: unknown protein (TAIR:AT1G32920.1); Has 35333 Blast hits to 34131 proteins in 2444 species: Archae - 798; Bacteria - 22429; Metazoa - 974; Fungi - 991; Plants - 531; Viruses - 0; Other Eukaryotes - 9610 (source: NCBI BLink). | chr1:11931332-11931586 FORWARD LENGTH=84
Ghir_D03G009300	NoHits	0	0	0	NA
Ghir_D03G009310	NoHits	0	0	0	NA
Ghir_D03G009320	NoHits	0	0	0	NA
Ghir_D03G009330	AT2G46770.1	0	0	0	Symbols: NST1, EMB2301, ANAC043 | NAC (No Apical Meristem) domain transcriptional regulator superfamily protein | chr2:19220917-19222822 REVERSE LENGTH=365
Ghir_D03G009340	AT4G10630.1	0.453672	1.26422	1.11058	Symbols: | Glutaredoxin family protein | chr4:6566625-6567629 REVERSE LENGTH=334
Ghir_D03G009350	AT5G42090.1	0.719821	3.77327	2.91385	Symbols: | Lung seven transmembrane receptor family protein | chr5:16826830-16828149 FORWARD LENGTH=439
Ghir_D03G009360	AT5G49040.1	0	2.82895	3.01728	Symbols: | Disease resistance-responsive (dirigent-like protein) family protein | chr5:19882676-19883251 REVERSE LENGTH=191
Ghir_D03G009370	AT4G02290.1	0	0	0	Symbols: AtGH9B13, GH9B13 | glycosyl hydrolase 9B13 | chr4:1002654-1005125 REVERSE LENGTH=516
Ghir_D03G009380	AT1G64680.1	0.339831	0.141388	0	Symbols: | unknown protein; BEST Arabidopsis thaliana protein match is: unknown protein (TAIR:AT1G03055.1); Has 146 Blast hits to 146 proteins in 26 species: Archae - 0; Bacteria - 6; Metazoa - 0; Fungi - 0; Plants - 125; Viruses - 0; Other Eukaryotes - 15 (source: NCBI BLink). | chr1:24036071-24037062 FORWARD LENGTH=250
Ghir_D03G009390	NA	0	0	0	NA
